# Supplementary material
Source: publisher figshare collection journal article supplement (https://karger.figshare.com/ndownloader/files/15471764)
Supplement: Supplementary file 1 [file 15471764]

**Supplementary Table 1:**

**(A) AKI within 48 h**

|                                            | <b>Sensitivity</b> | <b>Specificity</b> | <b>AUC</b>       | <b>n</b> |
|--------------------------------------------|--------------------|--------------------|------------------|----------|
| <b>Clinical Model</b>                      |                    |                    |                  |          |
| Gender (Female)                            | 0.54 (0.47-0.61)   | 0.54 (0.48-0.59)   | 0.56(0.48-0.59)  | 669      |
| APACHE II                                  | 0.60 (0.56-0.64)   | 0.60 (0.56-0.65)   | 0.63 (0.62-0.63) | 669      |
| Serum Creatinine                           | 0.72 (0.66-0.73)   | 0.62 (0.61-0.67)   | 0.70 (0.69-0.70) | 669      |
| Urine Output (ml/hr)                       | 0.63 (0.62-0.67)   | 0.73 (0.68-0.74)   | 0.72 (0.72-0.72) | 669      |
| BUN                                        | 0.63 (0.59-0.68)   | 0.60 (0.56-0.64)   | 0.64 (0.63-0.64) | 669      |
| <b>Urinary AKI Biomarker</b>               |                    |                    |                  |          |
| Albumin                                    | 0.66 (0.58-0.67)   | 0.64 (0.64-0.74)   | 0.68 (0.68-0.69) | 669      |
| NGAL                                       | 0.71 (0.69-0.76)   | 0.59 (0.55-0.60)   | 0.70 (0.7-0.704) | 669      |
| L-FABP                                     | 0.60 (0.59-0.66)   | 0.69 (0.62-0.702)  | 0.69 (0.68-0.69) | 357      |
| Kim1                                       | 0.59 (0.58-0.60)   | 0.70 (0.68-0.71)   | 0.65 (0.64-0.65) | 361      |
| $\pi$ GST                                  | 0.58 (0.52-0.61)   | 0.61 (0.58-0.69)   | 0.59 (0.58-0.59) | 304      |
| $\alpha$ GST                               | 0.50 (0.42-0.61)   | 0.57 (0.48-0.69)   | 0.53 (0.47-0.59) | 303      |
| Cystatin C                                 | 0.65 (0.63-0.67)   | 0.61 (0.59-0.62)   | 0.63 (0.62-0.63) | 355      |
| <b>Combination</b>                         |                    |                    |                  |          |
| Clinical Model                             | 0.70 (0.65-0.74)   | 0.69 (0.65-0.75)   | 0.75 (0.75-0.76) | 669      |
| Clinical Model +<br>Urinary NGAL + Albumin | 0.73 (0.66-0.76)   | 0.69 (0.65-0.76)   | 0.78 (0.77-0.78) | 669      |
| Clinical Model +<br>All urinary biomarkers | 0.73 (0.69-0.77)   | 0.76 (0.72-0.81)   | 0.80 (0.79-0.81) | 355      |

**(B) AKI within 7 days**

|                                            | <b>Sensitivity</b> | <b>Specificity</b> | <b>AUC</b>       | <b>n</b> |
|--------------------------------------------|--------------------|--------------------|------------------|----------|
| <b>Clinical Model</b>                      |                    |                    |                  |          |
| Gender (Female)                            | 0.54 (0.48-0.60)   | 0.54 (0.44-0.60)   | 0.55 (0.46-0.59) | 669      |
| APACHE II                                  | 0.61 (0.59-0.64)   | 0.61 (0.58-0.63)   | 0.64 (0.63-0.64) | 669      |
| Serum Creatinine                           | 0.69 (0.64-0.71)   | 0.65 (0.63-0.70)   | 0.70 (0.69-0.70) | 669      |
| Urine Output (ml/hr)                       | 0.63 (0.58-0.66)   | 0.68 (0.65-0.75)   | 0.69 (0.68-0.69) | 669      |
| BUN                                        | 0.61 (0.58-0.67)   | 0.62 (0.56-0.65)   | 0.64 (0.63-0.64) | 669      |
| <b>Urinary AKI Biomarker</b>               |                    |                    |                  |          |
| Albumin                                    | 0.67 (0.65-0.73)   | 0.61 (0.57-0.63)   | 0.70 (0.69-0.70) | 669      |
| NGAL                                       | 0.59 (0.57-0.62)   | 0.70 (0.66-0.72)   | 0.68 (0.68-0.68) | 669      |
| L-FABP                                     | 0.57 (0.56-0.59)   | 0.70 (0.67-0.72)   | 0.64 (0.63-0.64) | 357      |
| Kim1                                       | 0.57 (0.55-0.60)   | 0.58 (0.56-0.60)   | 0.57 (0.56-0.57) | 361      |
| $\pi$ GST                                  | 0.50 (0.48-0.55)   | 0.61 (0.54-0.65)   | 0.52 (0.50-0.53) | 304      |
| $\alpha$ GST                               | 0.65 (0.63-0.66)   | 0.64 (0.62-0.65)   | 0.64 (0.63-0.64) | 303      |
| Cystatin C                                 | 0.67 (0.65-0.73)   | 0.61 (0.57-0.63)   | 0.70 (0.69-0.70) | 355      |
| <b>Combination</b>                         |                    |                    |                  |          |
| Clinical Model                             | 0.65 (0.61-0.73)   | 0.72 (0.64-0.77)   | 0.74 (0.73-0.74) | 669      |
| Clinical Model +<br>Urinary NGAL + Albumin | 0.66 (0.62-0.70)   | 0.73 (0.68-0.76)   | 0.76 (0.75-0.76) | 669      |
| Clinical Model +<br>All urinary biomarkers | 0.66 (0.62-0.69)   | 0.79 (0.73-0.86)   | 0.78 (0.77-0.79) | 355      |

## Supplementary Table 2 – Sensitivity analysis

**(A) An evaluation of sensitivity of study results for prediction of AKI within 48h to the inclusion of recovery cases in the definition of AKI.** AKI, acute kidney injury, AUC, area under the receiver operating curve; df, degree's of freedom; UCr, urinary creatinine

|                                            | Prediction of 48h AKI (results as shown in Figure 2) |                                        | Prediction of 48h AKI (including recovery) |                                         |     |
|--------------------------------------------|------------------------------------------------------|----------------------------------------|--------------------------------------------|-----------------------------------------|-----|
|                                            | AUC                                                  | DeLong's test                          | AUC                                        | DeLong's test                           | n   |
| NGAL + Albumin                             |                                                      |                                        |                                            |                                         |     |
| Clinical Model                             | 0.758 (0.753-0.762)                                  | D = 0.73,<br>df = 1331.8,<br>p = 0.464 | 0.778 (0.774-0.781)                        | D = 0.886,<br>df = 1331.9,<br>p = 0.376 | 669 |
| Clinical Model +<br>Urinary NGAL + Albumin | 0.779 (0.775-0.783)                                  |                                        | 0.8 (0.796-0.803)                          |                                         | 669 |
| All Biomarkers                             |                                                      |                                        |                                            |                                         |     |
| Clinical Model                             | 0.78 (0.772-0.786)                                   | D = 0.59,<br>df = 706.68,<br>p = 0.555 | 0.772 (0.765-0.777)                        | D = 1.087, df = 704.02,<br>p = 0.277    | 335 |
| Clinical Model +<br>All urinary biomarkers | 0.802 (0.794-0.81)                                   |                                        | 0.809 (0.799-0.816)                        |                                         | 355 |

**(B) An evaluation of sensitivity of study results for prediction of AKI within 7d to the inclusion of recovery cases in the definition of AKI**

|                                         | Prediction of 7d AKI (results as shown in Figure 2) |                                           | Prediction of 7d AKI (including recovery) |                                         |     |
|-----------------------------------------|-----------------------------------------------------|-------------------------------------------|-------------------------------------------|-----------------------------------------|-----|
|                                         | AUC                                                 | DeLong's test                             | AUC                                       | DeLong's test                           | n   |
| NGAL + Albumin                          |                                                     |                                           |                                           |                                         |     |
| Clinical Model                          | 0.738 (0.734-0.742)                                 | D = 0.735,<br>df = 1331,<br>p = 0.467     | 0.766 (0.762-0.769)                       | D = 0.874,<br>df = 1331.6,<br>p = 0.382 | 669 |
| Clinical Model + Urinary NGAL + Albumin | 0.76 (0.755-0.763)                                  |                                           | 0.788 (0.785-0.791)                       |                                         | 669 |
| All biomarkers                          |                                                     |                                           |                                           |                                         |     |
| Clinical Model                          | 0.752 (0.745-0.757)                                 | D = 0.7338,<br>df = 706.05,<br>p = 0.4633 | 0.753 (0.745-0.758)                       | D = 1.457,<br>df=700.95,<br>p = 0.146   | 335 |
| Clinical Model + All urinary biomarkers | 0.78 (0.771-0.788)                                  |                                           | 0.803 (0.794-0.81)                        |                                         | 355 |

**(C) An evaluation of sensitivity of study results for prediction of Stage 3 AKI (vs no AKI or Stage 1 or 2 AKI) to the inclusion of biomarkers standardized relative to urine creatinine**

|                                            | Prediction of Stage 3 AKI (results as shown in Figure 1) |                                        | Prediction of Stage 3 AKI (with biomarkers over uCr) |                                       |
|--------------------------------------------|----------------------------------------------------------|----------------------------------------|------------------------------------------------------|---------------------------------------|
|                                            | AUC                                                      | DeLong's test                          | AUC                                                  | DeLong's test                         |
| NGAL + Albumin                             |                                                          |                                        |                                                      |                                       |
| Clinical Model*                            | 0.871 (0.866-0.875)                                      | D = 0.899,<br>df = 1309.3,<br>p= 0.369 | 0.869 (0.863-0.873)                                  | D = 0.743,<br>df = 1313,<br>p = 0.458 |
| Clinical Model +<br>Urinary NGAL + Albumin | 0.896 (0.891-0.899)                                      |                                        | 0.89 (0.885-0.893)                                   |                                       |
| All biomarkers                             |                                                          |                                        |                                                      |                                       |

|                                            |                     |                                        |                     |                                          |
|--------------------------------------------|---------------------|----------------------------------------|---------------------|------------------------------------------|
| Clinical Model*                            | 0.854 (0.844-0.86)  | D = 0.841,<br>df = 679.7,<br>p = 0.401 | 0.857 (0.846-0.865) | D = 0.656,<br>df = 682.71,<br>p = 0.5118 |
| Clinical Model +<br>All urinary biomarkers | 0.885 (0.874-0.893) |                                        | 0.883 (0.873-0.892) |                                          |

\* results for the clinical model may differ slightly in the comparison of unstandardized and standardized results due to differences in completeness of datasets from the addition of uCr to the analysis

#### (D) An evaluation of sensitivity of study results for prediction of AKI within 48h to the inclusion of biomarkers standardized relative to urine creatinine

|                                            | Prediction of 48h AKI (results as shown in Figure 2) |                                        | Prediction of 48h AKI (with biomarkers over uCr) |                                          |
|--------------------------------------------|------------------------------------------------------|----------------------------------------|--------------------------------------------------|------------------------------------------|
|                                            | AUC                                                  | DeLong's test                          | AUC                                              | DeLong's test                            |
| NGAL + Albumin                             |                                                      |                                        |                                                  |                                          |
| Clinical Model <sup>*</sup>                | 0.758 (0.753-0.762)                                  | D = 0.73,<br>df = 1331.8,<br>p = 0.464 | 0.758 (0.752-0.762)                              | D = 0.7694,<br>df = 1320.1,<br>p = 0.442 |
| Clinical Model +<br>Urinary NGAL + Albumin | 0.779 (0.775-0.783)                                  |                                        | 0.78 (0.775-0.784)                               |                                          |
| All biomarkers                             |                                                      |                                        |                                                  |                                          |
| Clinical Model <sup>*</sup>                | 0.78 (0.772-0.786)                                   | D = 0.59,<br>df = 706.68,<br>p= 0.555  | 0.774 (0.766-0.781)                              | D = 0.695,<br>df = 684.64,<br>p = 0.487  |
| Clinical Model +<br>All urinary biomarkers | 0.802 (0.794-0.81)                                   |                                        | 0.801 (0.791-0.809)                              |                                          |

\* results for the clinical model may differ slightly in the comparison of unstandardized and standardized results due to differences in completeness of datasets from the addition of uCr to the analysis

#### (E) An evaluation of sensitivity of study results for prediction of AKI within 7d to the inclusion of biomarkers standardized relative to urine creatinine

|                                         | Prediction of 7d AKI (results as shown in Figure 2) |                                     | Prediction of 7d AKI (with biomarkers over uCr) |                                  |
|-----------------------------------------|-----------------------------------------------------|-------------------------------------|-------------------------------------------------|----------------------------------|
|                                         | AUC                                                 | DeLong's test                       | AUC                                             | DeLong's test                    |
| NGAL + Albumin                          |                                                     |                                     |                                                 |                                  |
| Clinical Model*                         | 0.738 (0.734-0.742)                                 | D = 0.735, df = 1331, p = 0.467     | 0.739 (0.734-0.743)                             | D = 0.622, df = 1320.9, p= 0.534 |
| Clinical Model + Urinary NGAL + Albumin | 0.76 (0.755-0.763)                                  |                                     | 0.757 (0.752-0.761)                             |                                  |
| All biomarkers                          |                                                     |                                     |                                                 |                                  |
| Clinical Model*                         | 0.752 (0.745-0.757)                                 | D = 0.7338, df = 706.05, p = 0.4633 | 0.745 (0.737-0.751)                             | D = 0.698, df = 686.26, p= 0.485 |
| Clinical Model + All urinary biomarkers | 0.78 (0.771-0.788)                                  |                                     | 0.773 (0.763-0.781)                             |                                  |

\* results for the clinical model may differ slightly in the comparison of unstandardized and standardized results due to differences in completeness of datasets from the addition of uCr to the analysis

**(F) An evaluation of sensitivity of study results for prediction of Death or RRT (30 days) to the inclusion of biomarkers standardized relative to urine creatinine**

|                                            | Prediction of Death or RRT<br>(results as shown in Figure 4) |                                        | Prediction of Death or RRT<br>(with biomarkers over uCr) |                                           |
|--------------------------------------------|--------------------------------------------------------------|----------------------------------------|----------------------------------------------------------|-------------------------------------------|
|                                            | AUC                                                          | DeLong's<br>test                       | AUC                                                      | DeLong's test                             |
| NGAL + Albumin                             |                                                              |                                        |                                                          |                                           |
| Clinical Model*                            | 0.789 (0.784-0.792)                                          | D = 1.481,<br>df = 1319.4, p = 0.139   | 0.793 (0.79-0.797)                                       | D = 1.4964,<br>df = 1311.4,<br>p = 0.1348 |
| Clinical Model +<br>Urinary NGAL + Albumin | 0.828 (0.824-0.831)                                          |                                        | 0.833 (0.829-0.836)                                      |                                           |
| All biomarkers                             |                                                              |                                        |                                                          |                                           |
| Clinical Model*                            | 0.735 (0.725-0.741)                                          | D = 0.831,<br>df = 703.95,<br>p= 0.406 | 0.738 (0.729-0.744)                                      | D = 1.037,<br>df = 683.03,<br>p = 0.3003  |
| Clinical Model +<br>All urinary biomarkers | 0.768 (0.756-0.776)                                          |                                        | 0.778 (0.767-0.787)                                      |                                           |

\* results for the clinical model may differ slightly in the comparison of unstandardized and standardized results due to differences in completeness of datasets from the addition of uCr to the analysis
